# Supplementary material for: Discovery of an orexin receptor positive potentiator
Source: Royal Society of Chemistry journal article supplement (doi:10.1039/c0sc00197j), 2010-01-01

**Electronic Supplementary Information for:**

**Discovery Of An Orexin Receptor Positive Potentiator**

**Jiyong Lee<sup>1,3</sup>, M. Muralidhar Reddy and Thomas Kodadek<sup>2\*</sup>**

<sup>1</sup>Division of Translational Research, Departments of Internal Medicine and Molecular Biology, University of Texas Southwestern Medical Center, 5323 Harry Hines Blvd. Dallas, TX 75390 (USA).

<sup>2</sup>Departments of Chemistry & Cancer Biology, The Scripps Research Institute, Scripps Florida, 130 Scripps Way, Jupiter, FL 33458 (USA).

<sup>3</sup>Current Address: Department of Chemistry, The Scripps Research Institute, La Jolla, CA 92037 (USA).

\* To whom correspondence should be addressed. E-mail: [Kodadek@scripps.edu](mailto:Kodadek@scripps.edu)

## Supporting Figures and Table

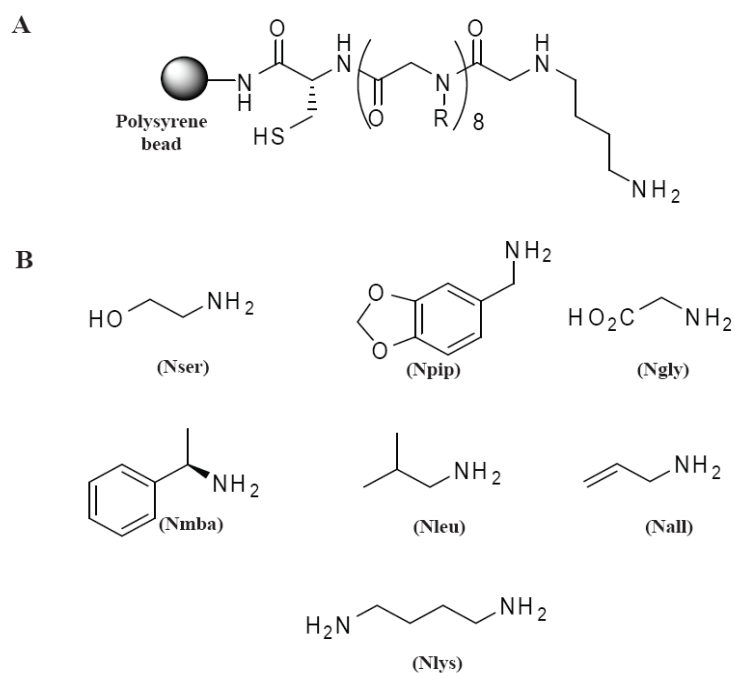

**Fig. S1** The peptoid library used in this study. (A) General structure of peptoid library. (B) Amines used for the preparation of the library. In brackets included the corresponding nomenclature of the peptoid residues.

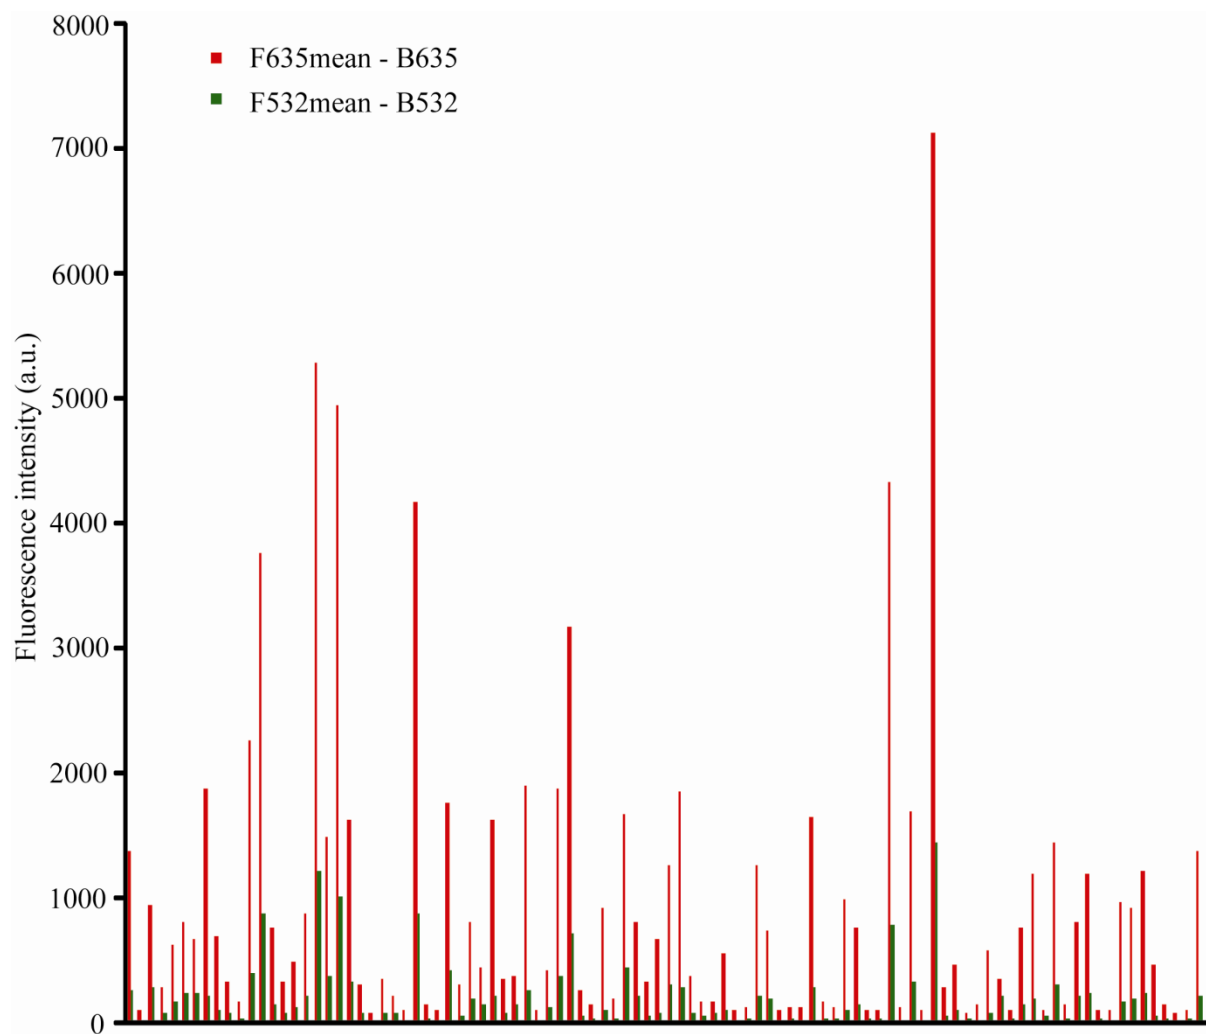

**Fig. S2** Background-subtracted fluorescence emission intensities with 635nm and 532 nm (excitation wavelengths).

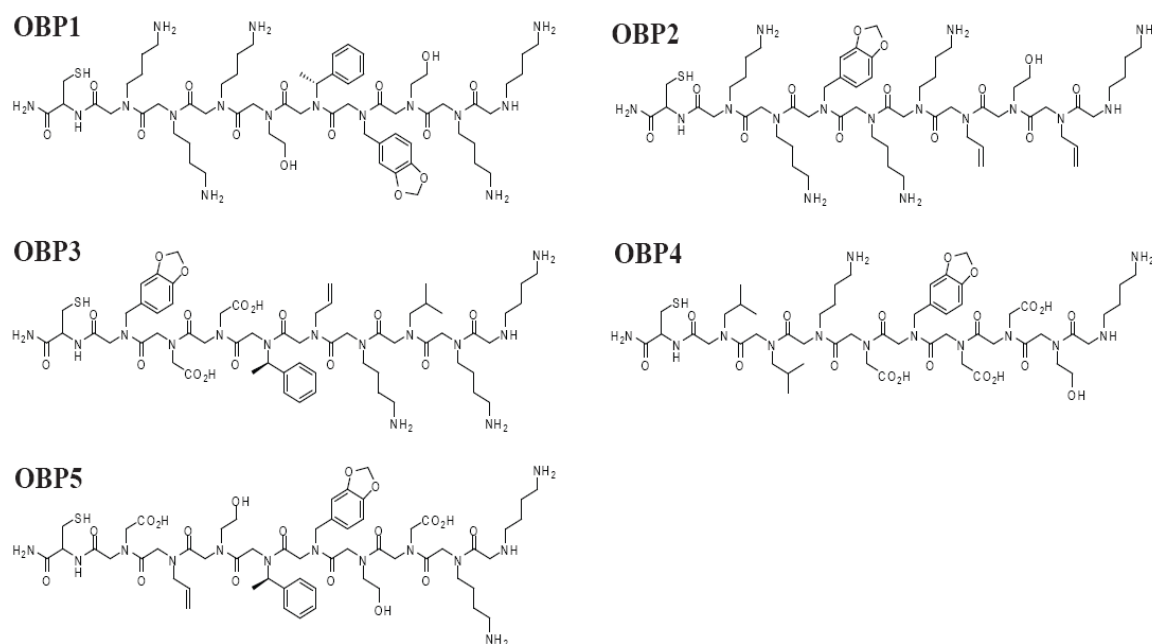

**Fig. S3** Chemical structures of hit peptoids (OBPs).

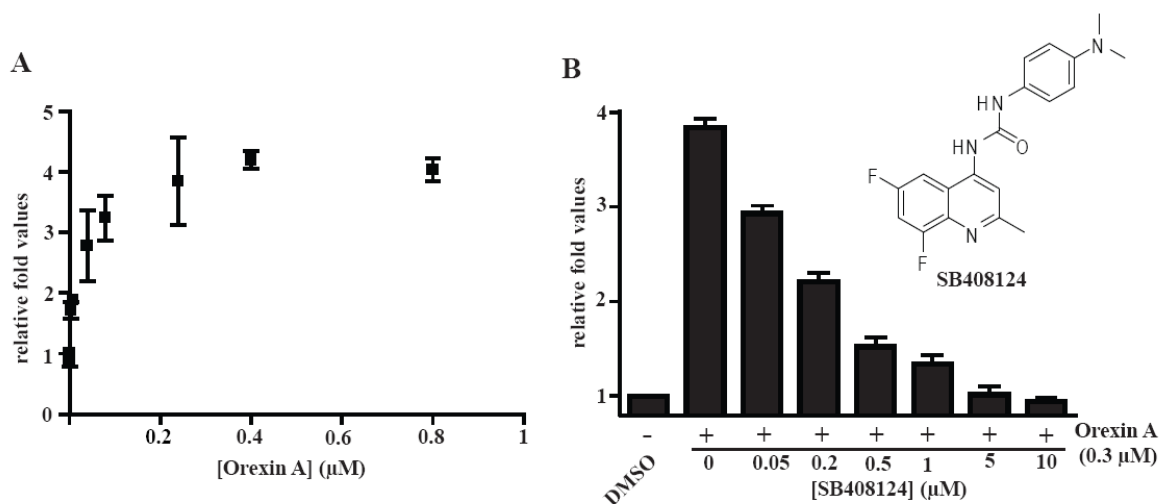

**Fig. S4** A reporter gene assay monitoring OXR1 activation by orexin A. **(A)** Orexin A induced a dose-dependent increase of cAMP production. **(B)** The OXR1 selective antagonist, SB408124 blocks orexin-induced cAMP production. Error bars represent the standard deviation of the mean from triplicate experiments.

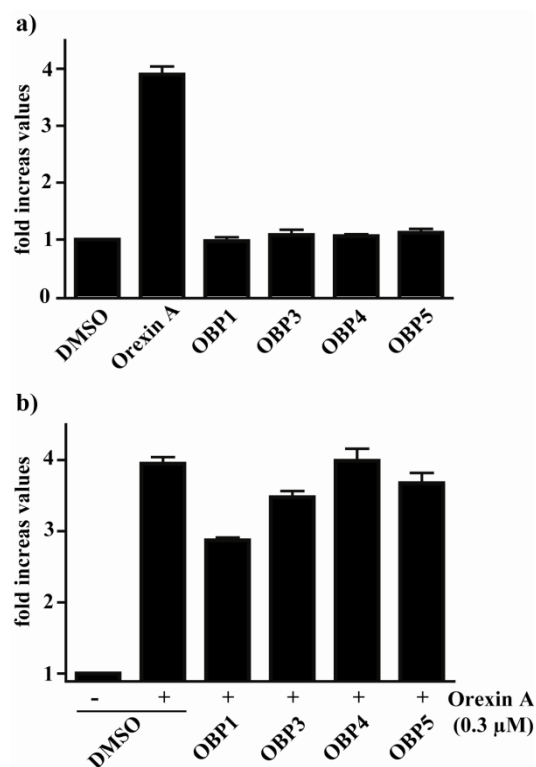

**Fig. S5** Effects of hit peptoids on human OXR1 function. Hit peptoids (OBPs) were tested for their agonist (a) or antagonist (b) activities. Error bars represent the standard deviation of the mean from triplicate experiments.

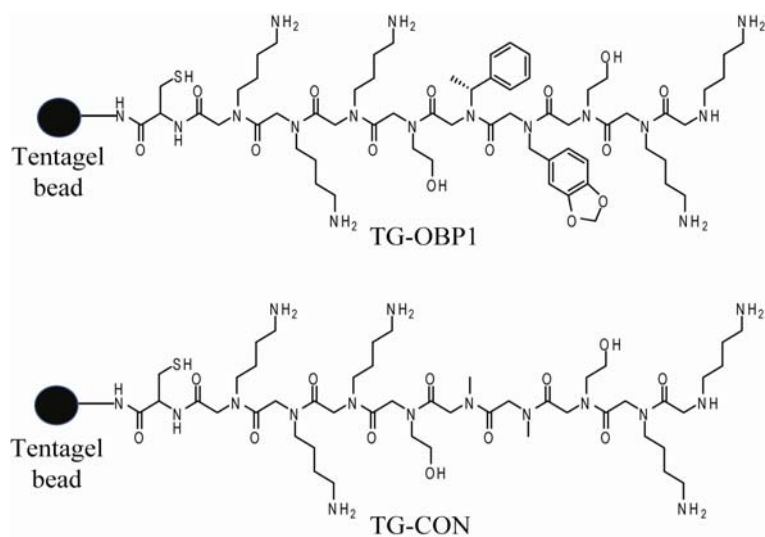

**Fig. S6** Chemical structure of TG-OBP1 and TG-CON.

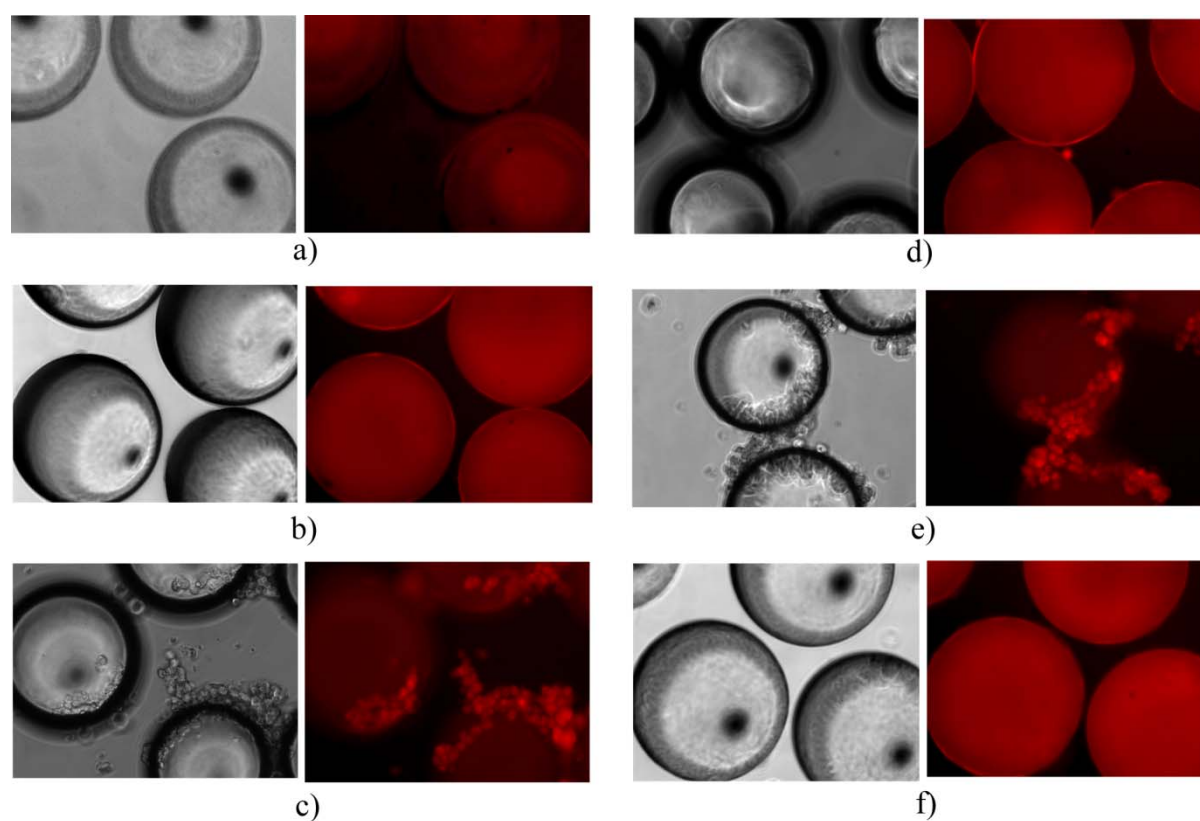

**Fig. S7** Bead-binding assay. Peptoids on Tentagel beads were incubated with Syto60-stained HEK293/hOXR1 or HEK293 in conditions indicated below and visualized under light (left) / fluorescence microscopy (Cy5-channel, right). a) TG + HEK293/hOXR1, b) TG-OBP1 + HEK293, c) TG-OBP1 + HEK293/hOXR1, d) TG-CON + HEK293/hOXR1, e) TG-OBP1 + HEK293/hOXR1 with free orexin A (10  $\mu$ M), f) TG-OBP1 + HEK293/hOXR1 with free OBP1 (5 mM). TG: Tentagel beads, TG-OBP1: Tentagel beads displaying OBP1, TG-CON: Tentagel beads displaying OBP1 in which side chains of Nmba and Npip were replaced with methyl groups.

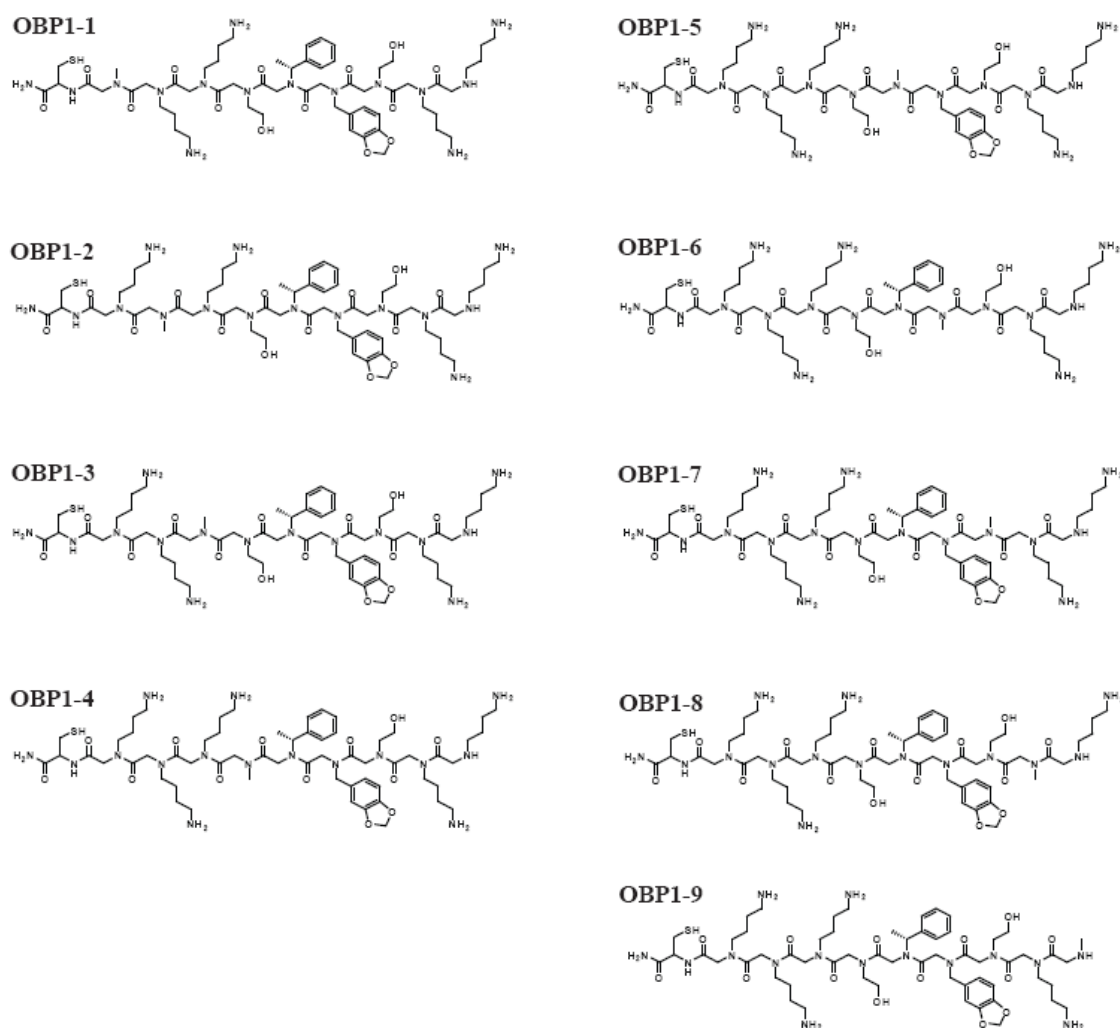

**Fig. S8** Chemical structures of OBP1-N, sarcosine derivatives.

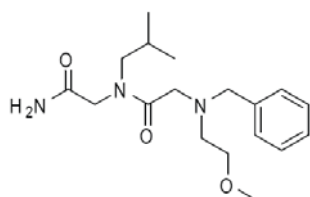

**Fig. S9** Chemical structure of CON.

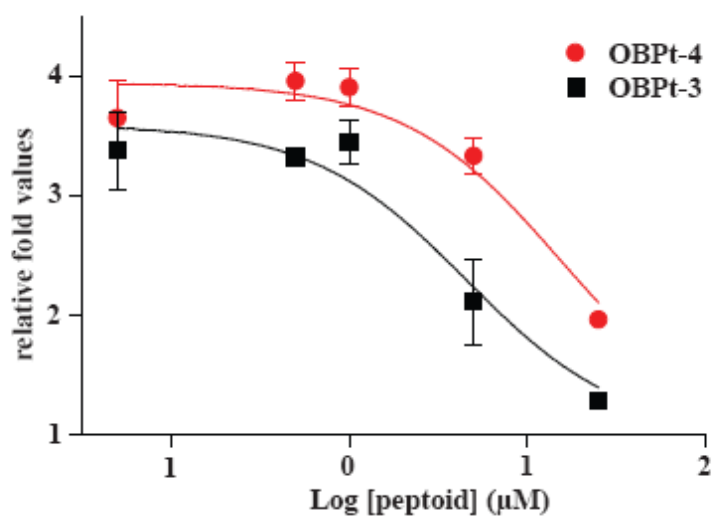

**Fig. S10** Antagonist activities of OBPt-3 and OBPt-4. Error bars represent the standard deviation of the mean from triplicate experiments.

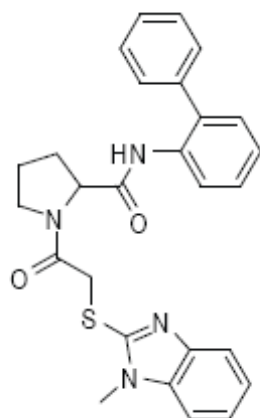

**Fig. S11** Chemical structure of proline bis-amide.

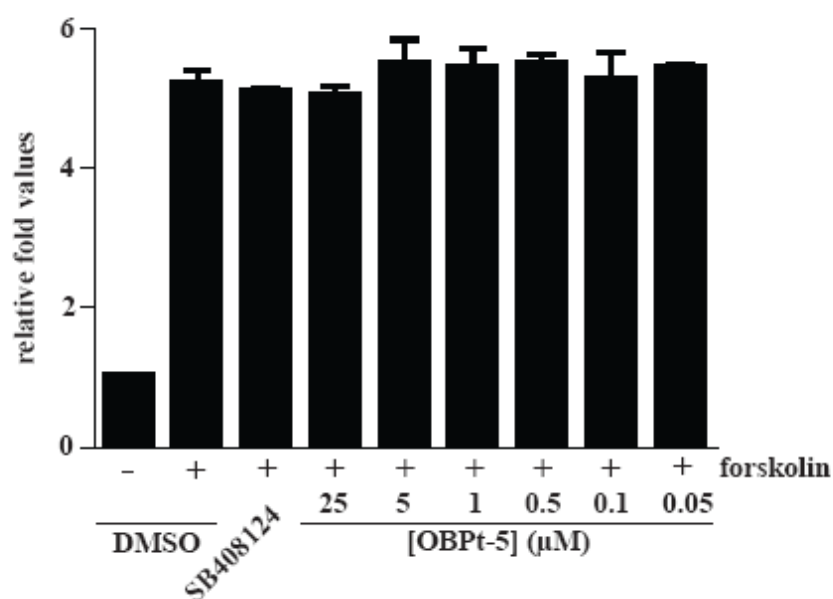

**Fig. S12** Effect of OBPt-5 on forskolin (fsk)-induced cAMP production in HEK293 cells. Error bars represent the standard deviation of the mean from triplicate experiments.

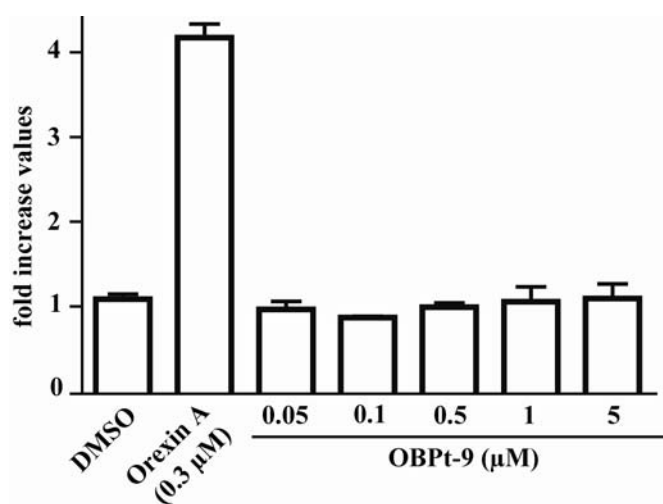

**Fig. S13** Effect of OBPt-9 in the absence of orexin A on cAMP level of OXR1 expressing cells. HEK293/hOX1R cells were transfected with pGL3-3 × CRE-TATA and pRLuc for 24 hr. After starvation for 4 hr, DMSO, Orexin A, or increasing concentrations of OBPt-9 were added to cells. After 6 hr, cAMP elevation of cells was monitored by measuring luciferase activity of lysates. Error bars represent the standard deviation of the mean from triplicate experiments.

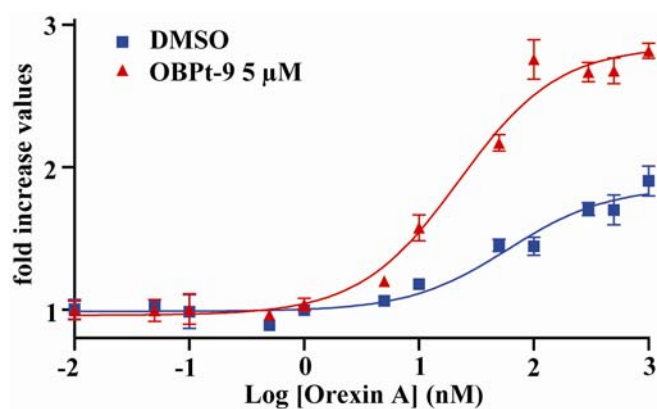

**Fig.S14** Concentration-response curves of orexin A on cAMP elevation of OXR2 expressing cells in the presence or absence of OBPt-9. Error bars represent the standard deviation of the mean from triplicate experiments.

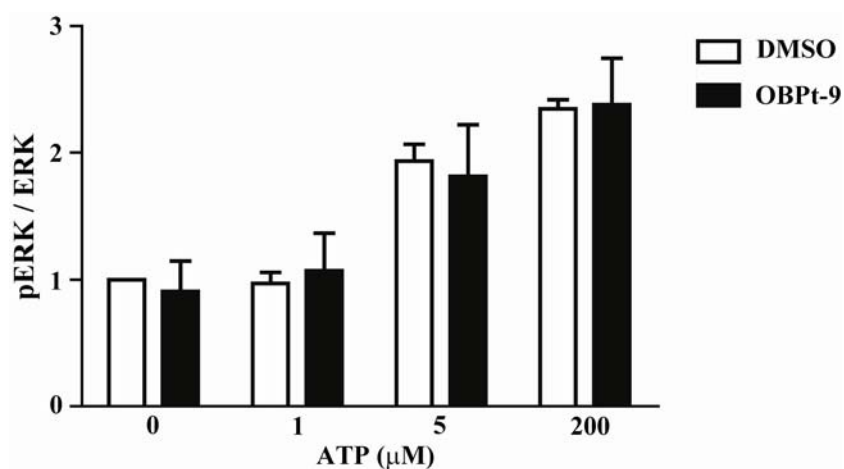

**Fig. S15** Effect of OBPt-9 on P2 receptor-mediated ERK phosphorylation. Serum-starved HEK293 cells were treated with DMSO or OBPt-9 (5 μM) for 20 min. Then the cells were incubated with increasing concentration of ATP for 10 min. ERK phosphorylation was detected by Western analysis. Error bars represent the standard deviation of the mean from triplicate experiments.

| Compound | Mass expected ( $[M+H]^+$ ) | Mass found ( $[M+H]^+$ ) |
|----------|-----------------------------|--------------------------|
| OBP1     | 1315.7                      | 1315.8                   |
| OBP2     | 1247.7                      | 1247.8                   |
| OBP3     | 1297.6                      | 1297.7                   |
| OBP4     | 1240.5                      | 1240.6                   |
| OBP5     | 1258.5                      | 1258.6                   |
| OBP1-1   | 1258.6                      | 1258.7                   |
| OBP1-2   | 1258.6                      | 1258.7                   |
| OBP1-3   | 1258.6                      | 1258.7                   |
| OBP1-4   | 1258.7                      | 1285.8                   |
| OBP1-5   | 1225.7                      | 1225.7                   |
| OBP1-6   | 1195.7                      | 1195.8                   |
| OBP1-7   | 1285.7                      | 1285.8                   |
| OBP1-8   | 1258.6                      | 1258.7                   |
| OBP1-9   | 1258.6                      | 1258.7                   |
| OBPt     | 370.1                       | 370.2                    |
| OBPt-1   | 460.2                       | 460.2                    |
| OBPt-2   | 474.2                       | 496.4 ( $[M+Na]^+$ )     |
| OBPt-3   | 403.1                       | 403.2                    |
| OBPt-4   | 474.2                       | 474.6                    |
| OBPt-5   | 417.2                       | 417.7                    |
| OBPt-6   | 417.2                       | 417.7                    |
| OBPt-7   | 469.2                       | 469.5                    |
| OBPt-8   | 447.2                       | 447.6                    |
| OBPt-9   | 476.2                       | 476.5                    |
| CON      | 336.2                       | 336.3                    |

**Table S1.** MALDI-TOF/MS data.

## MS/MS sequence analysis

**OBP1**

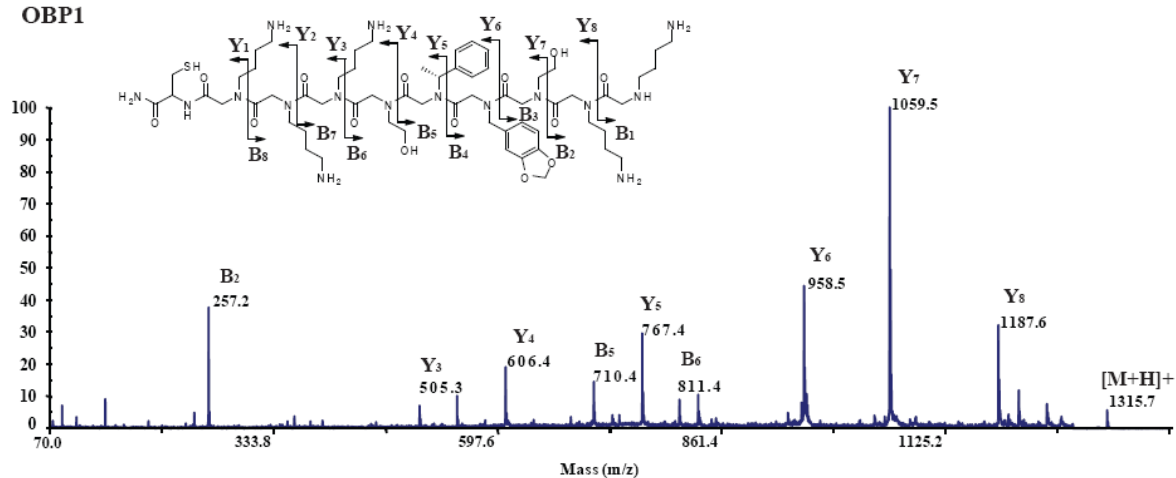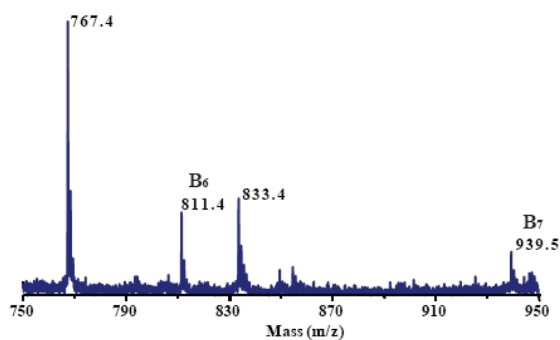

**OBP2**

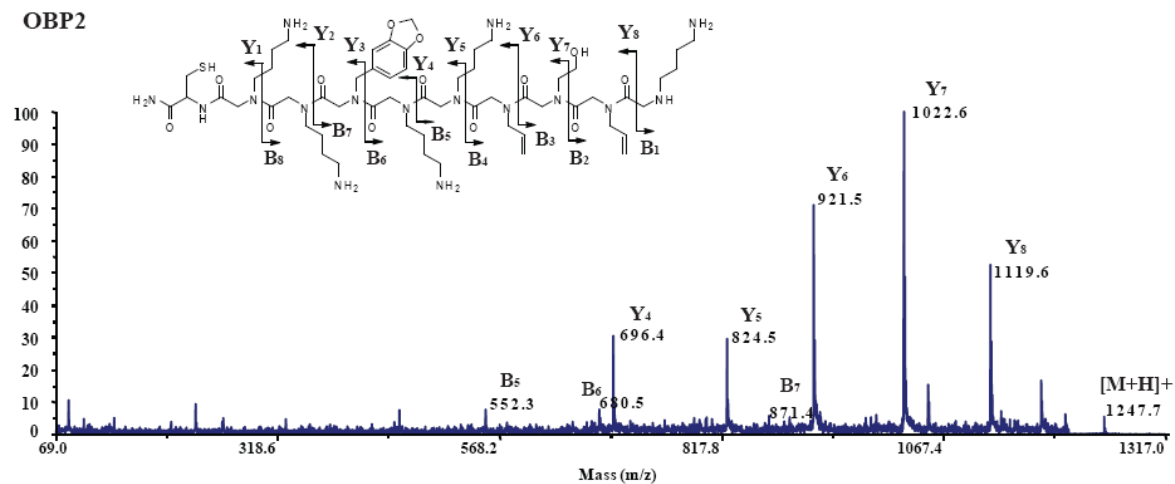

### OBP3

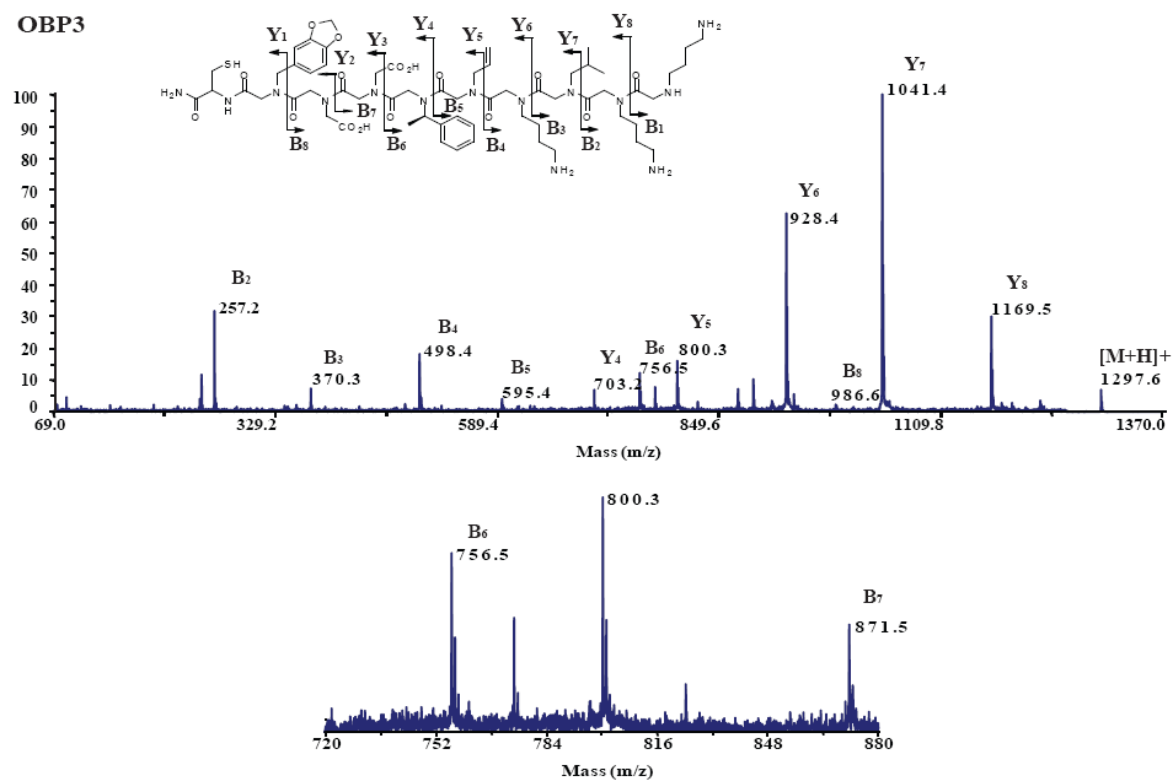

### OBP4

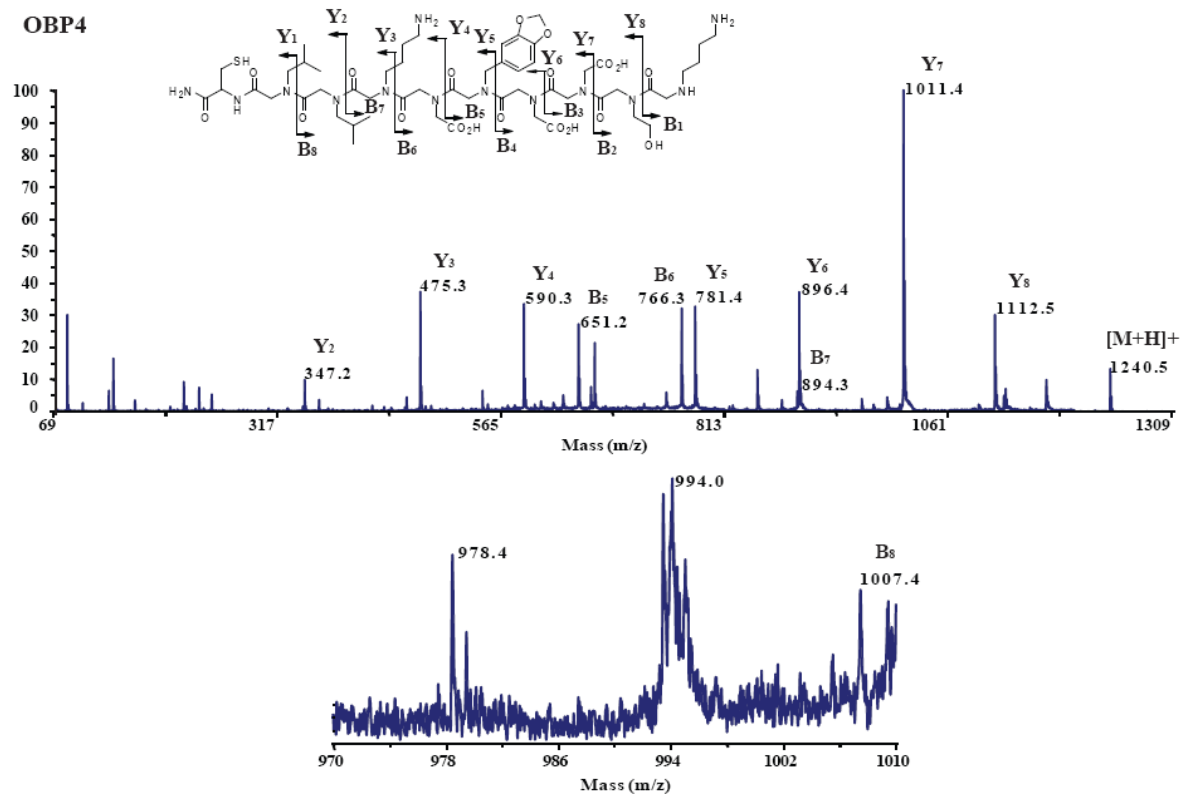

OBP5

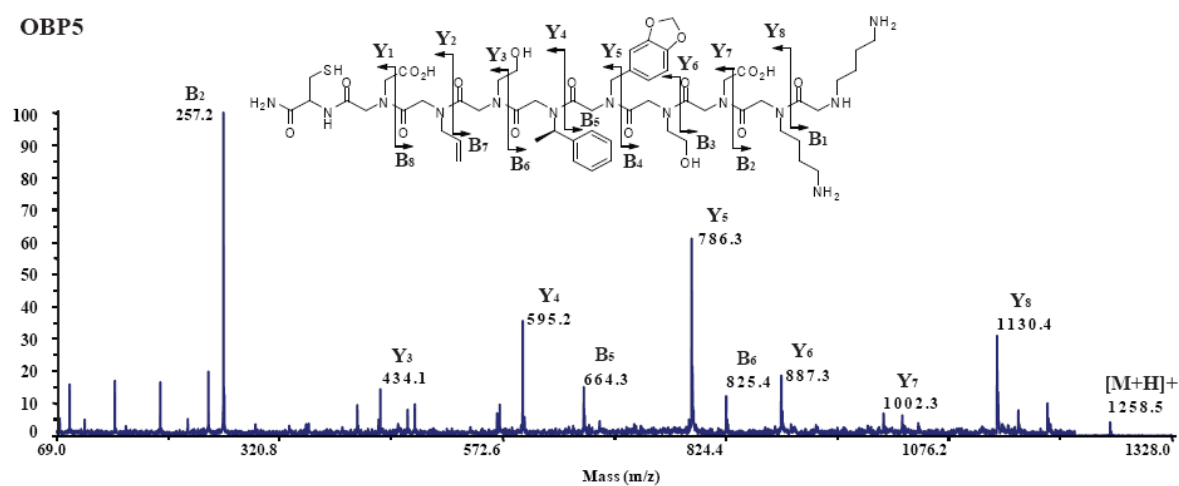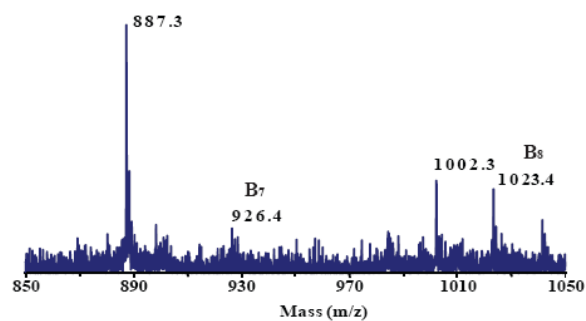

Supplement: c0sc00197j.pdf [file c0sc00197j.pdf]
